# Supplementary material for: Complexation between polyallylammonium cations and polystyrenesulfonate anions: the effect of ionic strength and the electrolyte type
Source: Royal Society of Chemistry journal article supplement (doi:10.1039/c4sm00651h), 2014-01-01
Supplement: c4sm00651h1.pdf [file c4sm00651h1.pdf]

**Complexation between polyallylammonium cation and polystyrenesulfonate  
anion; the effect of ionic strength and electrolyte type**

**SUPPORTING INFORMATION**

Josip Požar and Davor Kovačević

Division of Physical Chemistry, Department of Chemistry, Faculty of Science,  
University of Zagreb, Horvatovac 102a, 10000 Zagreb, Croatia

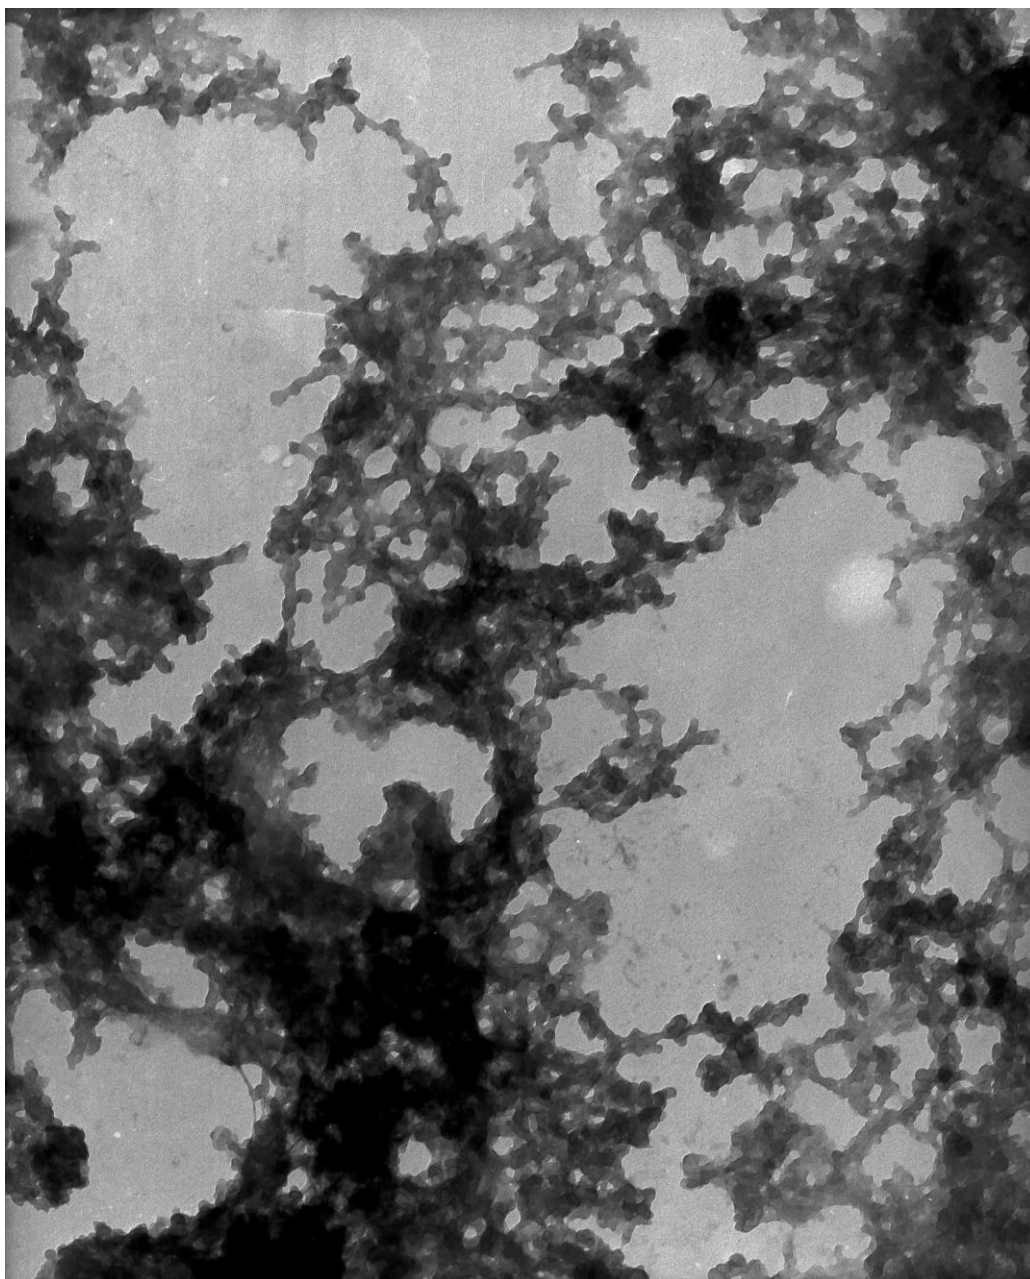

**Figure S1.** TEM photography of precipitate obtained by titration of sodium polystyrenesulfonate with polyallylammonium chloride at  $r = 1$ .

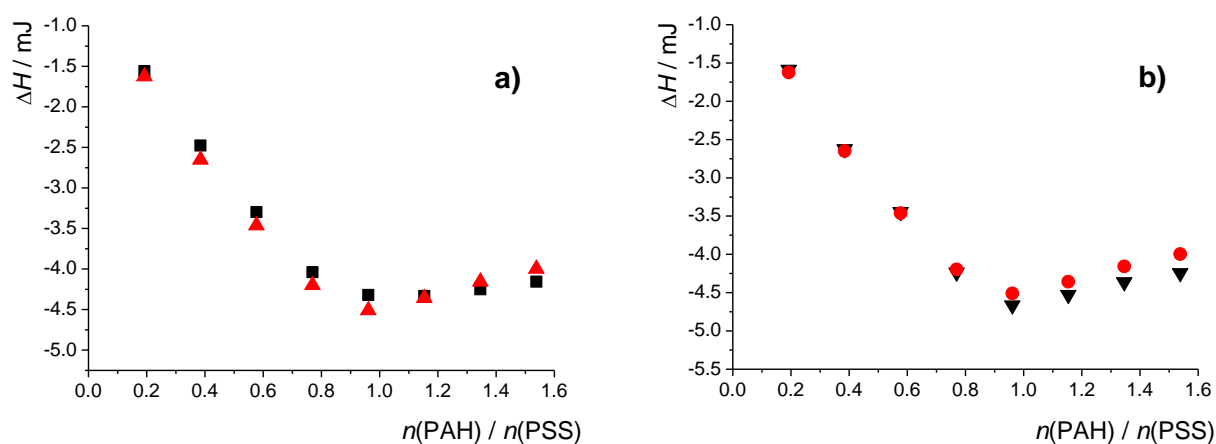

**Figure S2. a)** Cumulative enthalpy changes obtained by titration of sodium polystyrenesulfonate ( $c_m = 5 \times 10^{-3} \text{ mol dm}^{-3}$ ,  $V_0 = 1.3 \text{ mL}$ ) with polyallylammonium chloride ( $c_m = 5 \times 10^{-2} \text{ mol dm}^{-3}$ ) at different stirring rates (■ – 50 rpm, ▲ – 300 rpm), titrant delivery rate:  $300 \mu\text{l min}^{-1}$ ,  $\theta = (25.0 \pm 0.1) \text{ }^\circ\text{C}$ .

**b)** Cumulative enthalpy changes obtained by titration of sodium polystyrenesulfonate ( $c_m = 5 \times 10^{-3} \text{ mol dm}^{-3}$ ,  $V_0 = 1.3 \text{ mL}$ ) with polyallylammonium chloride ( $c_m = 5 \times 10^{-2} \text{ mol dm}^{-3}$ ) at different titrant delivery rates (● –  $50 \mu\text{l min}^{-1}$ , ▼ –  $300 \mu\text{l min}^{-1}$ ), stirring rate: 300 rpm,  $\theta = (25.0 \pm 0.1) \text{ }^\circ\text{C}$ .

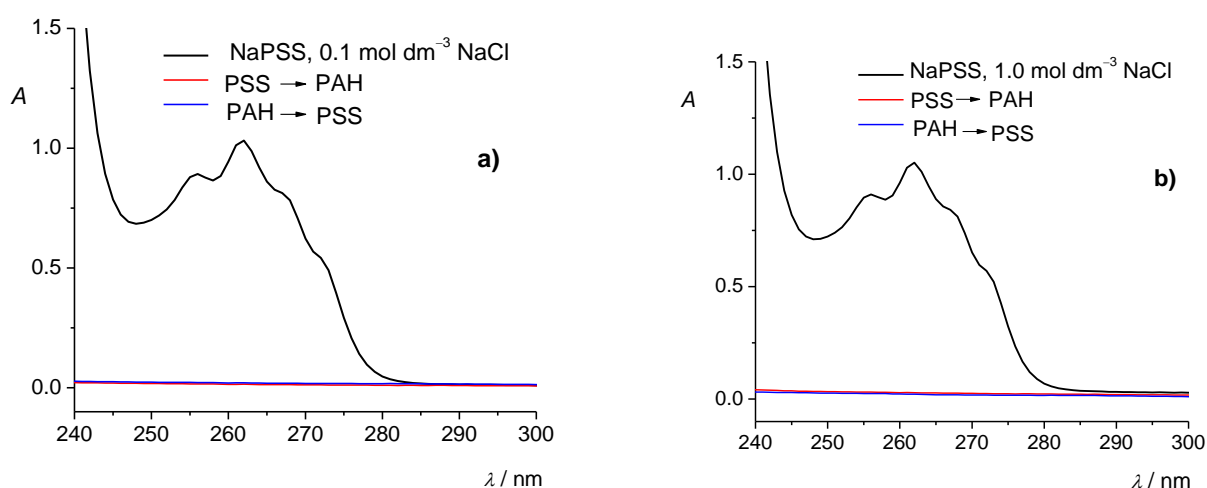

**Figure S3.** Spectra of supernatants obtained by centrifugation of suspensions prepared by titration of polycation with polyanion (PSS→PAH) and *vice versa* (PAH→PSS) at  $r = 1$  ( $\theta = 25.0 \pm 0.1 \text{ }^\circ\text{C}$ ). ( $r$  – ratio of oppositely charged monomers. NaPSS - spectrum of sodium polystyrenesulfonate ( $c_m = 3.3 \times 10^{-3} \text{ mol dm}^{-3}$ ), in NaCl ( $c = 0.1 \text{ mol dm}^{-3}$ ) (a) and ( $c = 1.0 \text{ mol dm}^{-3}$ ) (b).

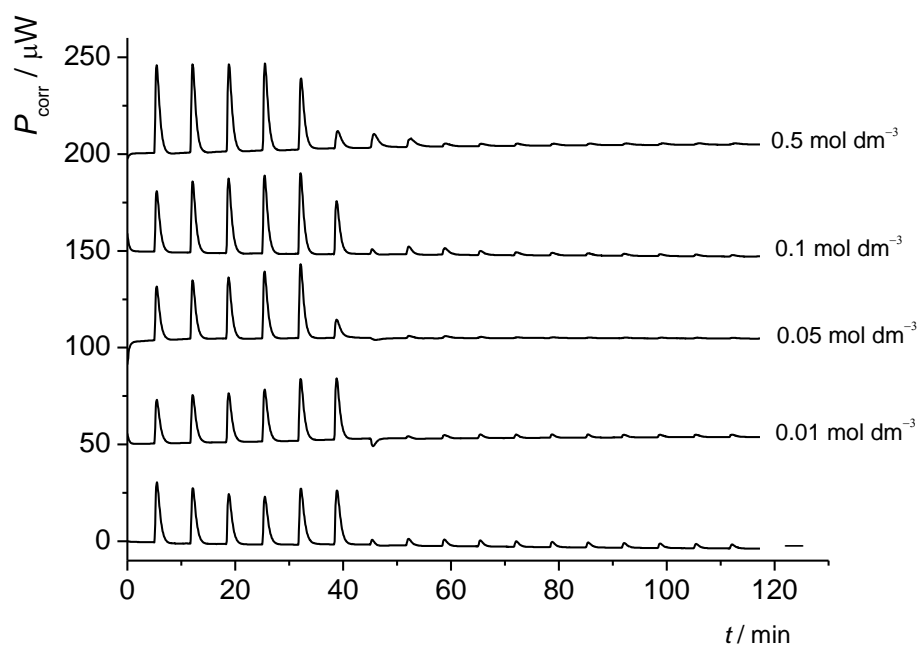

**Figure S4.** Thermograms obtained by titration polyallylammonium cation ( $c_m = 5 \times 10^{-3} \text{ mol dm}^{-3}$ ,  $V = 1.3 \text{ mL}$ ) with polystyrenesulfonate anion ( $c_m = 6 \times 10^{-2} \text{ mol dm}^{-3}$ ) in NaCl (aq),  $\theta = (25.0 \pm 0.1)^\circ \text{C}$ .

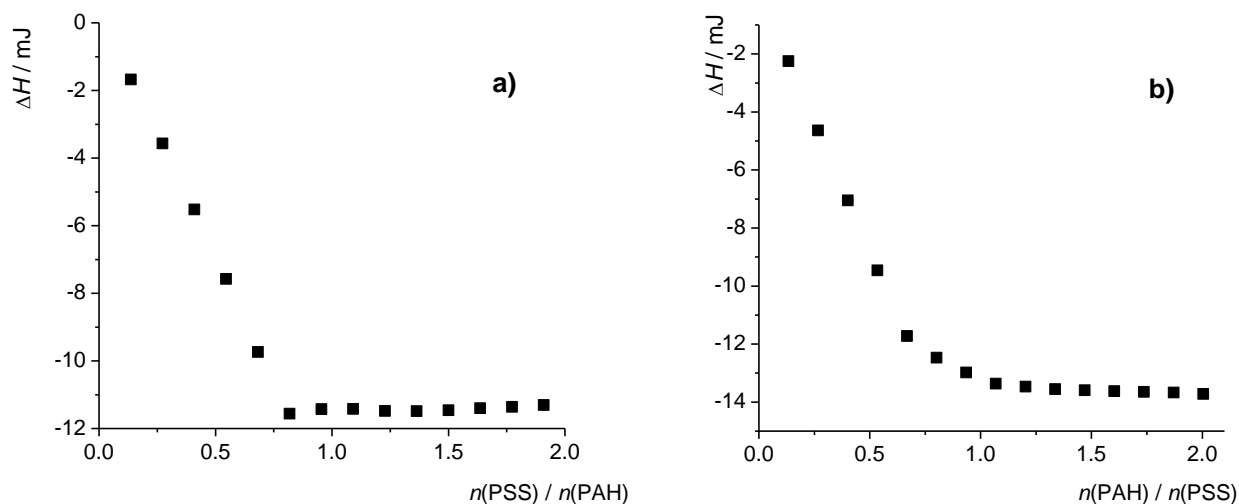

**Figure S5. a)** Cumulative enthalpy changes obtained by titration of polyallylammonium chloride ( $c_m = 5 \times 10^{-3} \text{ mol dm}^{-3}$ ,  $V_0 = 1.3 \text{ mL}$ ) with sodium polystyrenesulfonate ( $c_m = 6 \times 10^{-2} \text{ mol dm}^{-3}$ ) in  $0.1 \text{ mol dm}^{-3}$  NaCl,  $\theta = (25.0 \pm 0.1)^\circ \text{C}$ .

**b)** Cumulative enthalpy changes obtained by titration of sodium polystyrenesulfonate ( $c_m = 5 \times 10^{-3} \text{ mol dm}^{-3}$ ,  $V_0 = 1.3 \text{ mL}$ ) with polyallylammonium chloride ( $c_m = 7.5 \times 10^{-2} \text{ mol dm}^{-3}$ ) in  $0.1 \text{ mol dm}^{-3}$  NaCl,  $\theta = (25.0 \pm 0.1)^\circ \text{C}$ .

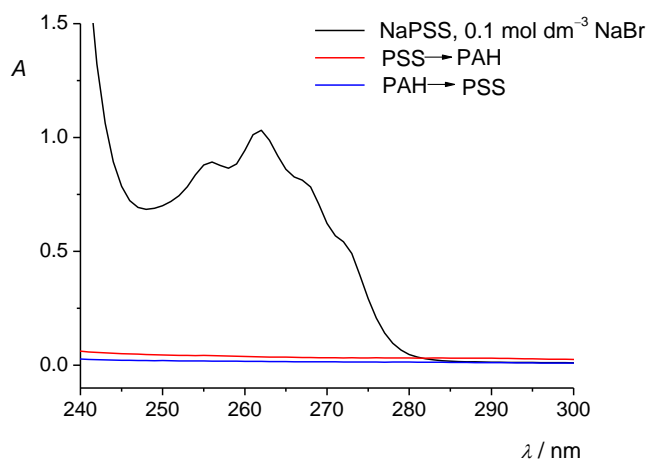

**Figure S6.** Spectra of supernatants obtained by centrifugation of suspensions prepared by titration of polycation with polyanion (PSS→PAH) and *vice versa* (PAH→PSS) at  $r = 1$  ( $\theta = 25.0 \pm 0.1$  °C). ( $r$  – ratio of oppositely charged monomers. NaPSS - spectrum of sodium polystyrenesulfonate ( $c_m = 3.3 \times 10^{-3}$  mol dm $^{-3}$ ), in NaBr ( $c = 0.1$  mol dm $^{-3}$ ).

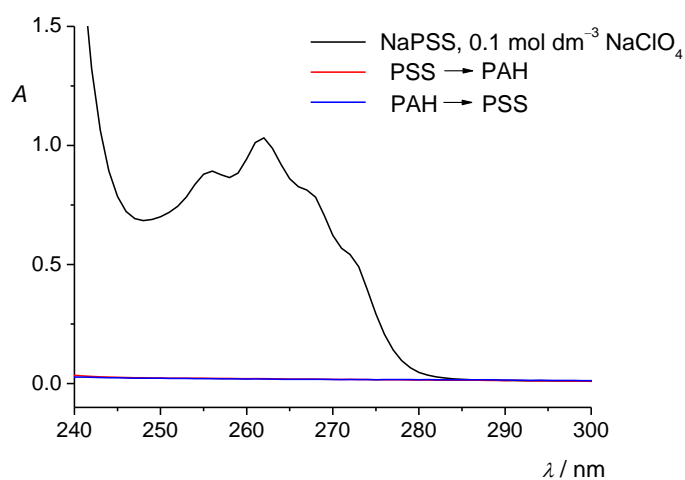

**Figure S7.** Spectra of supernatants obtained by centrifugation of suspensions prepared by titration of polycation with polyanion (PSS→PAH) and *vice versa* (PAH→PSS) at  $r = 1$  ( $\theta = 25.0 \pm 0.1$  °C). ( $r$  – ratio of oppositely charged monomers. NaPSS - spectrum of sodium polystyrenesulfonate ( $c_m = 3.3 \times 10^{-3}$  mol dm $^{-3}$ ), in NaClO $_4$  ( $c = 0.1$  mol dm $^{-3}$ ).

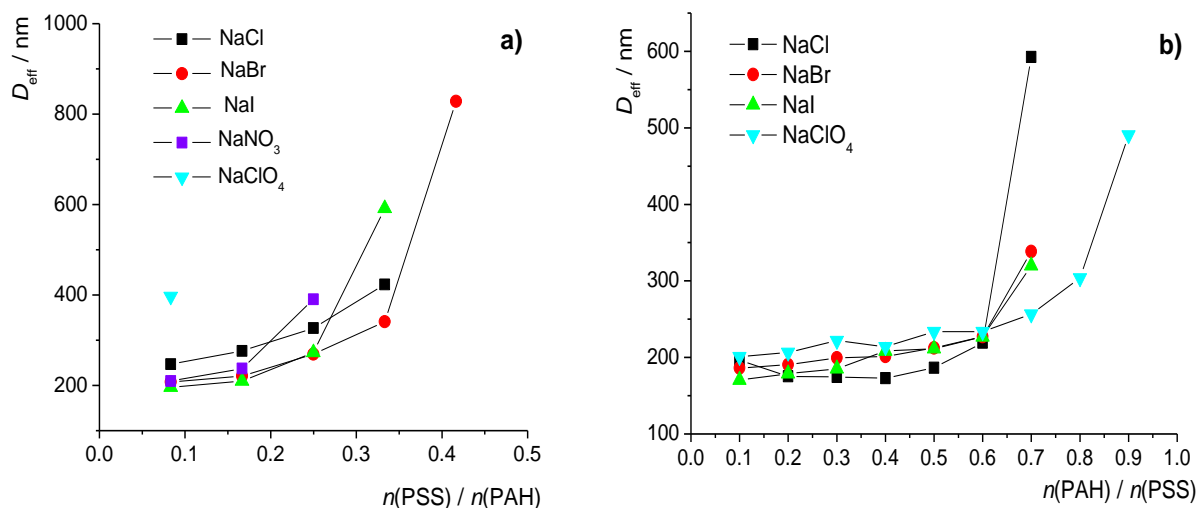

**Figure S8.a)** Hydrodynamic diameters of colloid complexes obtained by titration of polyallylammonium cation ( $c_m = 1 \times 10^{-3} \text{ mol dm}^{-3}$ ,  $V = 2 \text{ mL}$ ) with polystyrenesulfonate anion ( $c_m = 1.7 \times 10^{-2} \text{ mol dm}^{-3}$ ) in NaX (aq,  $c = 1.0 \text{ mol dm}^{-3}$ ) at  $25 \text{ }^\circ\text{C}$ .

**b)** Hydrodynamic diameters of colloid complexes obtained by titration of polystyrenesulfonate anion ( $c_m = 1 \times 10^{-3} \text{ mol dm}^{-3}$ ,  $V = 2 \text{ mL}$ ) with polyallylammonium cation ( $c_m = 2.0 \times 10^{-2} \text{ mol dm}^{-3}$ ) in NaX (aq,  $c = 1.0 \text{ mol dm}^{-3}$ ) at  $25 \text{ }^\circ\text{C}$ .

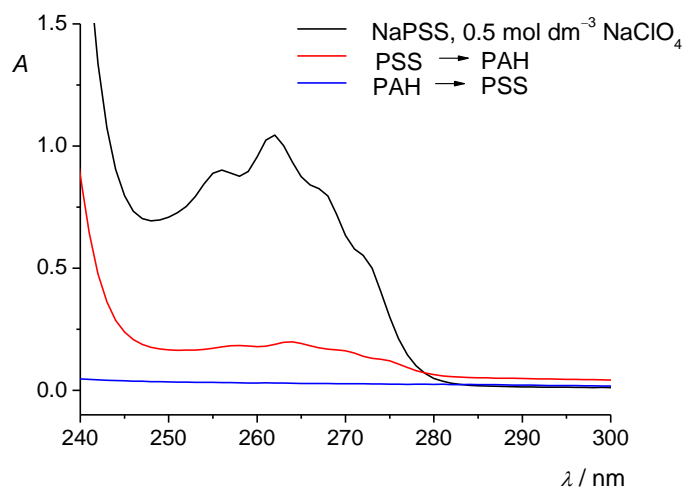

**Figure S9.** Spectra of supernatants obtained by centrifugation of suspensions prepared by titration of polycation with polyanion (PSS  $\rightarrow$  PAH) and *vice versa* (PAH  $\rightarrow$  PSS) at  $r = 1$  ( $\theta = 25.0 \pm 0.1 \text{ }^\circ\text{C}$ ). ( $r$  – ratio of oppositely charged monomers. NaPSS – spectrum of sodium polystyrenesulfonate ( $c_m = 3.3 \times 10^{-3} \text{ mol dm}^{-3}$ ), in  $\text{NaClO}_4$  ( $c = 0.5 \text{ mol dm}^{-3}$ ).

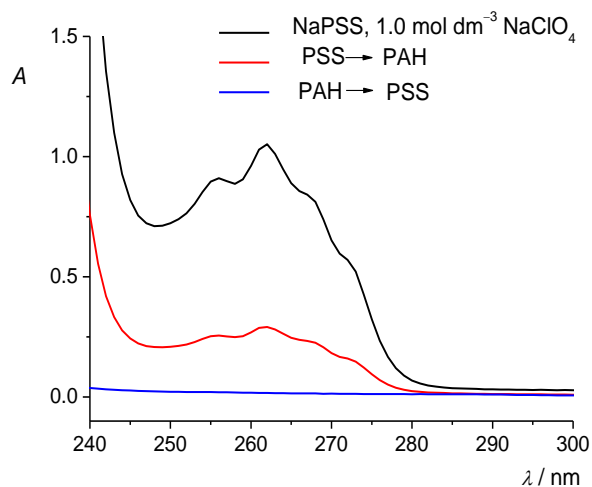

**Figure S10.** Spectra of supernatants obtained by centrifugation of suspensions prepared by titration of polycation with polyanion (PSS→PAH) and *vice versa* (PAH→PSS) at  $r = 1$  ( $\theta = 25.0 \pm 0.1$  °C). NaPSS - spectrum of sodium polystyrenesulfonate ( $c_m = 3.3 \times 10^{-3}$  mol dm<sup>-3</sup>), in NaClO<sub>4</sub> ( $c = 1.0$  mol dm<sup>-3</sup>). The analytical concentration of positively and negatively charged monomers was always equal to monomer concentration in NaPSS.

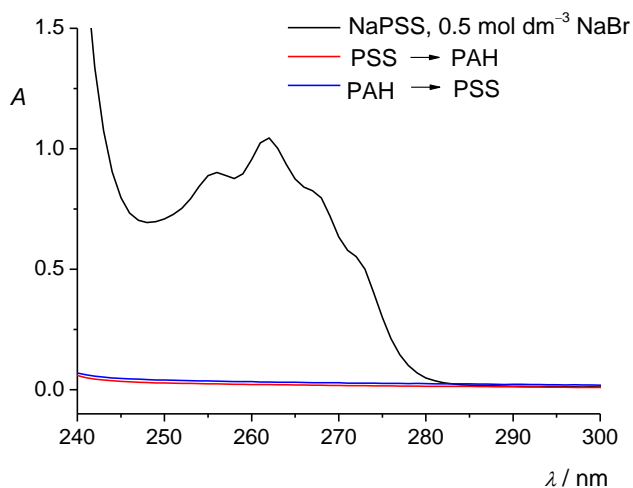

**Figure S11.** Spectra of supernatants obtained by centrifugation of suspensions prepared by titration of polycation with polyanion (PSS→PAH) and *vice versa* (PAH→PSS) at  $r = 1$  ( $\theta = 25.0 \pm 0.1$  °C). ( $r$  – ratio of oppositely charged monomers. NaPSS - spectrum of sodium polystyrenesulfonate ( $c_m = 3.3 \times 10^{-3}$  mol dm<sup>-3</sup>), in NaBr ( $c = 0.5$  mol dm<sup>-3</sup>).

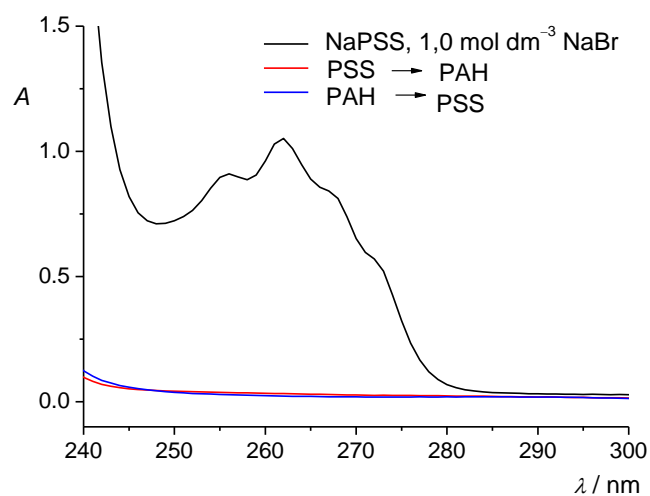

**Figure S12.** Spectra of supernatants obtained by centrifugation of suspensions prepared by titration of polycation with polyanion (PSS→PAH) and *vice versa* (PAH→PSS) at  $r = 1$  ( $\theta = 25.0 \pm 0.1$  °C). NaPSS - spectrum of sodium polystyrenesulfonate ( $c_m = 3.3 \times 10^{-3}$  mol dm $^{-3}$ ), in NaBr ( $c = 1.0$  mol dm $^{-3}$ ). The analytical concentration of positively and negatively charged monomers was always equal to monomer concentration in NaPSS.
